# Supplementary material for: Fabrication of nanocomposites composed of silver cyanamide and titania for improved photocatalytic hydrogen generation
Source: Royal Society of Chemistry journal article supplement (doi:10.1039/c5dt03869c), 2015-01-01
Supplement: c5dt03869c1.pdf [file c5dt03869c1.pdf]

## Supplementary information

### Fabrication of nanocomposites composed of silver cyanamide and titania for improved photocatalytic hydrogen generation

Hao Meng<sup>a</sup>, Xiaoxue Li<sup>a</sup>, Xia Zhang<sup>†a</sup>, Yufeng Liu<sup>‡b</sup>, Yan Xu<sup>a</sup>, Yide Han<sup>a</sup> and Junli Xu<sup>a</sup>

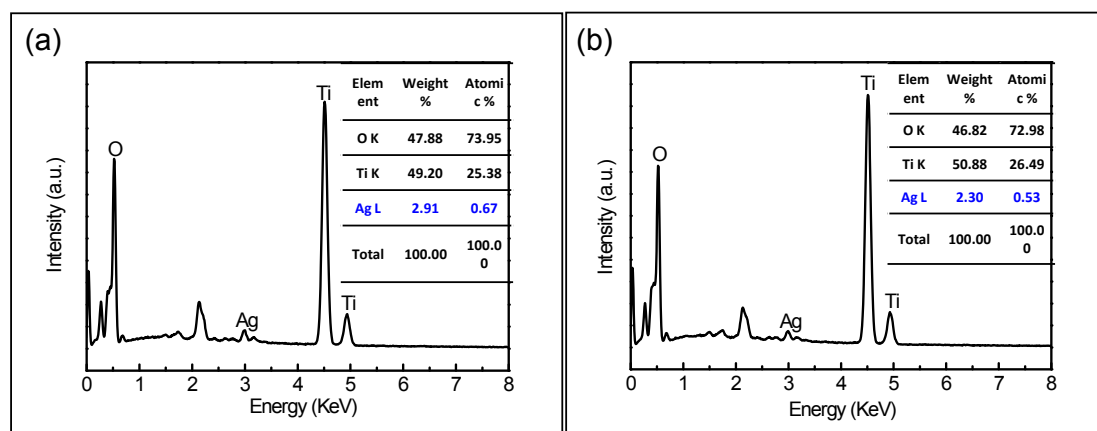

Fig. S1 EDX spectra of Ti-90/Ag<sub>2</sub>NCN before (a) and after (b) photocatalytic experiments
